# Supplementary material for: Manganese-catalyzed oxidation of furfuryl alcohols and furfurals to efficient synthesis of furoic acids
Source: Royal Society of Chemistry journal article supplement (doi:10.1039/d4ra05903d), 2024-01-01
Supplement: d4ra05903d1.pdf [file d4ra05903d1.pdf]

## Supporting Information

### **Manganese-Catalyzed Oxidation of Furfuryl Alcohols and Furfurals to Efficient Synthesis of Furoic Acids**

Tianshu Kou,<sup>a</sup> Weihua Chen,<sup>a</sup> Aimin He,<sup>a</sup> Xiaoru Wang,<sup>a</sup> Xin Li,<sup>a</sup> Bing Cui,<sup>b</sup> Zhiyong Wu,<sup>b</sup> Mingqin Zhao,<sup>\*b</sup> Min Xie,<sup>\*a</sup> and Zihui Shao<sup>\*b</sup>

<sup>a</sup> Technology Center of China Tobacco Hebei Industrial Co., LTD, Shijiazhuang 050051, China

<sup>b</sup> Flavors and Fragrance Engineering & Technology Research Center of Henan Province, College of Tobacco Science, Henan Agricultural University, Zhengzhou 450000, China.

## Table of Contents

|                                                                                                                                                                             |    |
|-----------------------------------------------------------------------------------------------------------------------------------------------------------------------------|----|
| General Considerations .....                                                                                                                                                | 3  |
| General procedures for the dehydrogenation coupling of 2-furfuryl alcohol with hydroxide to 2-furoic acid catalyzed by [Mn]-I.....                                          | 4  |
| General procedures for the dehydrogenation coupling of furfuryl alcohols with hydroxide to furoic acids catalyzed by [Mn]-I.....                                            | 5  |
| General procedures for the dehydrogenation coupling of furfurals with hydroxide to furoic acids catalyzed by [Mn]-I .....                                                   | 6  |
| General procedures for the dehydrogenation coupling of difunctional substituted furyl alcohols and aldehydes with hydroxide to furan dicarboxylic acid catalyzed by [Mn]-I7 |    |
| Characterization Data of Products.....                                                                                                                                      | 8  |
| Reference.....                                                                                                                                                              | 11 |

## General Considerations

The synthesis of ligands and preparation of catalysts in this work were reported in our previous publication<sup>[1]</sup>. Air and moisture sensitive reactions were carried out in glovebox or in over-dried glassware sealed with rubber septa using standard schlenk techniques. Most solvents used were dried over solvent purification system (Innovative Technology PS-MD-5) and alcohol solvents were dried over calcium hydride. Deuterated solvents were purchased from Cambridge Isotope Laboratories, vented and distilled over calcium hydride. All chemicals were purchased from commercial sources with purity over 95% and used without further purification. NMR spectra were received using a Bruker 400 MHz spectrometer. Chemical shifts are reported in ppm relative to the deuterated solvent. GC analysis were carried out on SHIMADAZU GC 2010 PLUS system. (Column: SH-Rtx-200, 30 m x 0.25 mm x 0.25  $\mu$ m). GC/MS analyses were carried out on an GC-MS-QP2010 SE W system equipped with aSH-Rxi-5Sil MS 30 meter, 0.25 mmID, 0.25  $\mu$ m df. High resolution exact mass measurements (HRMS) were performed on Thermo SCIENTIFIC Q EXACTIVE.

## General procedures for the dehydrogenation coupling of 2-furfuryl alcohol with hydroxide to 2-furoic acid catalyzed by [Mn]-I

Under the protection of argon, 2-furfuryl alcohol **1** (1 mmol), [Mn] (0.005 mmol, 0.5 mol%), Base (1.0 mmol, 1.0 equiv), H<sub>2</sub>O (20 mg, 1.1 mmol, 1.1 equiv), and 1,4-dioxane (2 mL) were added sequentially to a 25 mL schlenk tube equipped with a magnetic stir bar. The reaction was stirred at 165 °C for 16 hours. After cooling to room temperature, water (5 mL) was added and the mixture was extracted with diethyl ether (3 × 5 mL). Then the aqueous phase was acidified with 6M HCl and extracted with ethyl acetate (3 × 10 mL). The combined ethyl acetate solution were washed with brine (15 mL), dried over anhydrous Na<sub>2</sub>SO<sub>4</sub>, and evaporated to dryness under reduced pressure, the pure acids was obtained and weighted for calculating the yield. Yield = n (acid) / n (alcohol).

**Table S1. Optimization of Reaction Conditions.**

(1) [Mn] (0.5 mol%)  
Base (x eq), H<sub>2</sub>O (1.1 eq)  
Solvent (m mL), T °C, 16 h  
(2) HCl work up

| Entry | [Mn]                   | Base                           | x [equiv.] | Solvent | m [mL] | T [°C] | Y <sub>2a</sub> [%] |
|-------|------------------------|--------------------------------|------------|---------|--------|--------|---------------------|
| 1     | [Mn]-I                 | KOH                            | 1.0        | Dioxane | 2      | 165    | 92                  |
| 2     | [Mn]-II                | KOH                            | 1.0        | Dioxane | 2      | 165    | 87                  |
| 3     | [Mn]-III               | KOH                            | 1.0        | Dioxane | 2      | 165    | 81                  |
| 4     | [Mn]-IV                | KOH                            | 1.0        | Dioxane | 2      | 165    | 46                  |
| 5     | Mn(CO) <sub>5</sub> Br | KOH                            | 1.0        | Dioxane | 2      | 165    | < 5                 |
| 6     | MnCl <sub>2</sub>      | KOH                            | 1.0        | Dioxane | 2      | 165    | < 5                 |
| 7     | none                   | KOH                            | 1.0        | Dioxane | 2      | 165    | < 5                 |
| 8     | [Mn]-I                 | NaOH                           | 1.0        | Dioxane | 2      | 165    | 86                  |
| 9     | [Mn]-I                 | <sup>t</sup> BuOK              | 1.0        | Dioxane | 2      | 165    | 27                  |
| 10    | [Mn]-I                 | K <sub>2</sub> CO <sub>3</sub> | 1.0        | Dioxane | 2      | 165    | 14                  |
| 11    | [Mn]-I                 | KOH                            | 1.0        | Dioxane | 2      | 140    | 83                  |
| 12    | [Mn]-I                 | KOH                            | 1.2        | Dioxane | 2      | 165    | 92                  |
| 13    | [Mn]-I                 | KOH                            | 0.8        | Dioxane | 2      | 165    | 76                  |
| 14    | [Mn]-I                 | KOH                            | 1.0        | Toluene | 2      | 165    | 85                  |
| 15    | [Mn]-I                 | KOH                            | 1.0        | Anisole | 2      | 165    | 87                  |
| 16    | [Mn]-I                 | KOH                            | 1.0        | Dioxane | 1      | 165    | 85                  |

<sup>a</sup> Reaction conditions: Unless otherwise specified, reactions were performed on a 1 mmol scale of furfuryl alcohol **1a**, using 1.0 equiv of base, 1.1 equiv of H<sub>2</sub>O, 0.5 mol% of Mn-precatalyst, in 2 mL dioxane at 165 °C for 16 h. Isolated yields are shown.

## **General procedures for the dehydrogenation coupling of furfuryl alcohols with hydroxide to furoic acids catalyzed by [Mn]-I**

Under the protection of argon, furfuryl alcohols **1** (1 mmol), [Mn]-I (2.5 mg, 0.005 mmol, 0.5 mol%), KOH (56 mg, 1.0 mmol, 1.0 equiv), H<sub>2</sub>O (20 mg, 1.1 mmol, 1.1 equiv), and 1,4-dioxane (2 mL) were added sequentially to a 25 mL schlenk tube equipped with a magnetic stir bar. The reaction was stirred at 165 °C for 16 hours. After cooling to room temperature, water (5 mL) was added and the mixture was extracted with diethyl ether (3 × 5 mL). Then the aqueous phase was acidified with 6M HCl and extracted with ethyl acetate (3 × 10 mL). The combined ethyl acetate solution were washed with brine (15 mL), dried over anhydrous Na<sub>2</sub>SO<sub>4</sub>, and evaporated to dryness under reduced pressure, the pure acids was obtained and weighted for calculating the yield. Yield = n (acid) / n (alcohol).

## **General procedures for the dehydrogenation coupling of furfurals with hydroxide to furoic acids catalyzed by [Mn]-I**

Under the protection of argon, furfurals **3** (1 mmol), [Mn]-I (2.5 mg, 0.005 mmol, 0.5 mol%), KOH (56 mg, 1.0 mmol, 1.0 equiv), H<sub>2</sub>O (20 mg, 1.1 mmol, 1.1 equiv), and 1,4-dioxane (2 mL) were added sequentially to a 25 mL schlenk tube equipped with a magnetic stir bar. The reaction was stirred at 120 °C for 6 hours. After cooling to room temperature, water (5 mL) was added and the mixture was extracted with diethyl ether (3 × 5 mL). Then the aqueous phase was acidified with 6M HCl and extracted with ethyl acetate (3 × 10 mL). The combined ethyl acetate solution were washed with brine (15 mL), dried over anhydrous Na<sub>2</sub>SO<sub>4</sub>, and evaporated to dryness under reduced pressure, the pure acids was obtained and weighted for calculating the yield. Yield = n (acid) / n (aldehyde).

## **General procedures for the dehydrogenation coupling of difunctional substituted furyl alcohols and aldehydes with hydroxide to furan dicarboxylic acid catalyzed by [Mn]-I**

Under the protection of argon, substrate **4** (1 mmol), [Mn]-I (2.5 mg, 0.005 mmol, 0.5 mol%), KOH (112 mg, 2.0 mmol, 2.0 equiv), H<sub>2</sub>O (40 mg, 2.2 mmol, 2.2 equiv), and 1,4-dioxane (2 mL) were added sequentially to a 25 mL schlenk tube equipped with a magnetic stir bar. The reaction was stirred at 165 °C for 16 hours. After cooling to room temperature, water (5 mL) was added and the mixture was extracted with diethyl ether (3 × 5 mL). Then the aqueous phase was acidified with 6M HCl and extracted with ethyl acetate (3 × 10 mL). The combined ethyl acetate solution were washed with brine (15 mL), dried over anhydrous Na<sub>2</sub>SO<sub>4</sub>, and evaporated to dryness under reduced pressure, the pure acids was obtained and weighted for calculating the yield. Yield = n (acid) / n (substrate).

## Characterization Data of Products

### 2-furoic acid **2a**<sup>[2]</sup>

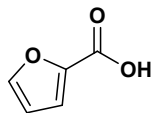

Product was isolated as white solid. <sup>1</sup>H NMR (400 MHz, DMSO-*d*<sub>6</sub>) δ 13.06 (s, 1H), 8.09 – 7.67 (m, 1H), 7.22 (dd, *J* = 3.5, 0.9 Hz, 1H), 6.65 (dd, *J* = 3.5, 1.8 Hz, 1H). <sup>13</sup>C NMR (101 MHz, DMSO-*d*<sub>6</sub>) δ 159.77 (s), 147.47 (s), 145.36 (s), 118.15 (s), 112.53 (s).

### 3-furoic acid **2b**<sup>[3]</sup>

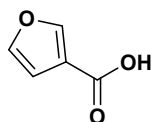

Product was isolated as white solid. <sup>1</sup>H NMR (400 MHz, DMSO-*d*<sub>6</sub>) δ 12.54 (s, 1H), 8.29 (s, 1H), 7.77 (s, 1H), 6.73 (d, *J* = 1.9 Hz, 1H). <sup>13</sup>C NMR (101 MHz, DMSO-*d*<sub>6</sub>) δ 164.34 (s), 148.56 (s), 145.04 (s), 120.28 (s), 110.31 (s).

### 5-Methyl-2-furoic acid **2c**<sup>[4]</sup>

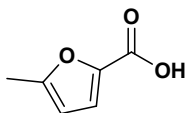

Product was isolated as white solid. <sup>1</sup>H NMR (400 MHz, DMSO-*d*<sub>6</sub>) δ 7.10 (d, *J* = 3.4 Hz, 1H), 6.28 (d, *J* = 3.2 Hz, 1H), 2.33 (s, 3H). <sup>13</sup>C NMR (101 MHz, DMSO-*d*<sub>6</sub>) δ 159.70 (s), 157.01 (s), 143.74 (s), 119.56 (s), 109.05 (s), 13.94 (s).

### 5-(methoxymethyl)-2-furoic acid **2d**<sup>[5]</sup>

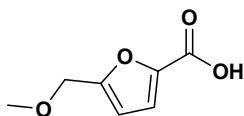

Product was isolated as white solid. <sup>1</sup>H NMR (400 MHz, DMSO-*d*<sub>6</sub>) δ 7.17 (d, *J* = 3.4 Hz, 1H), 6.60 (d, *J* = 3.4 Hz, 1H), 4.40 (s, 2H), 3.27 (s, 3H). <sup>13</sup>C NMR (101 MHz, DMSO-*d*<sub>6</sub>) δ 159.71 (s), 156.04 (s), 145.12 (s), 118.78 (s), 111.81 (s), 65.85 (s), 57.92 (s).

### 5-chloro-2-furoic acid **2e**<sup>[6]</sup>



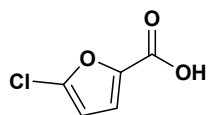

Product was isolated as white solid.  $^1\text{H}$  NMR (400 MHz,  $\text{DMSO-}d_6$ )  $\delta$  7.29 (d,  $J = 3.5$  Hz, 1H), 6.69 (d,  $J = 3.6$  Hz, 1H).  $^{13}\text{C}$  NMR (101 MHz,  $\text{DMSO-}d_6$ )  $\delta$  158.71 (s), 144.97 (s), 139.57 (s), 120.45 (s), 110.04 (s).

5-bromofuroic acid **2f**<sup>[7]</sup>

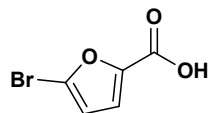

Product was isolated as white solid.  $^1\text{H}$  NMR (400 MHz,  $\text{DMSO-}d_6$ )  $\delta$  7.25 (d,  $J = 3.6$  Hz, 1H), 6.80 (d,  $J = 3.6$  Hz, 1H).  $^{13}\text{C}$  NMR (101 MHz,  $\text{DMSO-}d_6$ )  $\delta$  158.69 (s), 147.25 (s), 127.18 (s), 120.52 (s), 114.82 (s).

2-bromofuran-4-carboxylic acid **2g**<sup>[8]</sup>

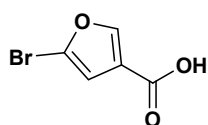

Product was isolated as white solid.  $^1\text{H}$  NMR (400 MHz,  $\text{DMSO-}d_6$ )  $\delta$  8.37 (s, 1H), 6.84 (s, 1H).  $^{13}\text{C}$  NMR (101 MHz,  $\text{DMSO-}d_6$ )  $\delta$  163.19 (s), 150.37 (s), 123.96 (s), 122.66 (s), 111.93 (s).

2-methyl-3-furoic acid **2h**<sup>[9]</sup>

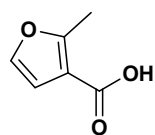

Product was isolated as white solid.  $^1\text{H}$  NMR (400 MHz,  $\text{DMSO-}d_6$ )  $\delta$  7.55 (d,  $J = 2.0$  Hz, 1H), 6.62 (d,  $J = 1.9$  Hz, 1H), 2.51 (s, 3H).  $^{13}\text{C}$  NMR (101 MHz,  $\text{DMSO-}d_6$ )  $\delta$  165.17 (s), 158.69 (s), 141.64 (s), 114.21 (s), 111.28 (s), 13.76 (s).

2,5-dimethyl-3-furoic acid **2i**<sup>[10]</sup>

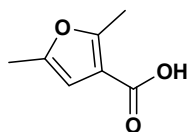

Product was isolated as white solid.  $^1\text{H}$  NMR (400 MHz,  $\text{DMSO-}d_6$ )  $\delta$  6.21 (d,  $J = 1.3$  Hz, 1H), 2.45 (s, 3H), 2.21 (s, 3H).  $^{13}\text{C}$  NMR (101 MHz,  $\text{DMSO-}d_6$ )  $\delta$  165.20 (s), 157.18 (s), 150.15 (s), 114.58 (s), 106.96 (s), 13.70 (s), 13.28 (s).

2,5-furandicarboxylic acid **5a**<sup>[4]</sup>

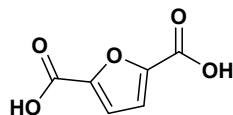

Product was isolated as white solid.  $^1\text{H}$  NMR (400 MHz,  $\text{DMSO-}d_6$ )  $\delta$  7.29 (s, 2H).  $^{13}\text{C}$  NMR (101 MHz,  $\text{DMSO-}d_6$ )  $\delta$  159.35 (s), 147.47 (s), 118.84 (s).

2,3-furandicarboxylic acid **5b**<sup>[11]</sup>

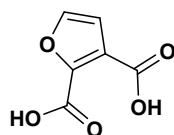

Product was isolated as white solid.  $^1\text{H}$  NMR (400 MHz,  $\text{DMSO-}d_6$ )  $\delta$  7.93 (d,  $J = 1.8$  Hz, 1H), 6.90 (d,  $J = 1.8$  Hz, 1H).  $^{13}\text{C}$  NMR (101 MHz,  $\text{DMSO-}d_6$ )  $\delta$  165.09 (s), 159.78 (s), 146.21 (s), 145.54 (s), 124.81 (s), 113.44 (s).

3,4-furandicarboxylic acid **5c**<sup>[12]</sup>

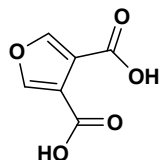

Product was isolated as white solid.  $^1\text{H}$  NMR (400 MHz,  $\text{DMSO-}d_6$ )  $\delta$  8.41 (s, 2H).  $^{13}\text{C}$  NMR (101 MHz,  $\text{DMSO-}d_6$ )  $\delta$  164.51 (s), 150.94 (s), 118.58 (s).

## Reference

- [1] S. Fu, Z. Shao, Y. Wang, Q. Liu, *J. Am. Chem. Soc.* **2017**, *139*, 11941-11948.
- [2] H. S. Yang, L. Macha, H.-J. Ha, J. W. Yang, *Org. Chem. Front.* **2021**, *8*, 53-60.
- [3] S. L. Yedage, B. M. Bhanage, *J. Org. Chem.* **2017**, *82*, 5769-5781.
- [4] K. Gupta, R. K. Rai, A. D. Dwivedi, S. K. Singh, *ChemCatChem* **2017**, *9*, 2760-2767.
- [5] J.-T. Sha, J. Yu, J.-R. Dai, G.-H. Lu, M.-H. Zong, N. Li, *Adv. Synth. Catal.* **2024**, *366*, 1189-1198.
- [6] D. A. Sandham, L. Barker, D. Beattie, D. Beer, L. Bidlake, D. Bentley, K. D. Butler, S. Craig, D. Farr, C. Ffoulkes-Jones, J. R. Fozard, S. Haberthuer, C. Howes, D. Hynx, S. Jeffers, T. H. Keller, P. A. Kirkham, J. C. Maas, L. Mazzoni, A. Nicholls, G. E. Pilgrim, E. Schaebulin, G. M. Spooner, R. Stringer, P. Tranter, K. L. Turner, M. F. Tweed, C. Walker, S. J. Watson, B. M. Cuenoud, *Bioorgan. Med. Chem.* **2004**, *12*, 5213-5224.
- [7] Z. Chen, H. Zhou, F. Kong, M. Wang, *Appl. Catal. B Environ.* **2022**, *309*, 121281.
- [8] T. Terai, M. Kohno, G. Boncompain, S. Sugiyama, N. Saito, R. Fujikake, T. Ueno, T. Komatsu, K. Hanaoka, T. Okabe, Y. Urano, F. Perez, T. Nagano, *J. Am. Chem. Soc.* **2015**, *137*, 10464-10467.
- [9] W. S. Trahanovsky, Y. J. Huang, M. Leung, *J. Org. Chem.* **1994**, *59*, 2594-2598.
- [10] I. H. Eissa, H. Mohammad, O. A. Qassem, W. Younis, T. M. Abdelghany, A. Elshafeey, M. M. Abd Rabo Moustafa, M. N. Seleem, A. S. Mayhoub, *Eur. J. Med. Chem.* **2017**, *130*, 73-85.
- [11] K. Miller-Moslin, S. Peukert, R. K. Jain, M. A. McEwan, R. Karki, L. Llamas, N. Yusuff, F. He, Y. Li, Y. Sun, M. Dai, L. Perez, W. Michael, T. Sheng, H. Lei, R. Zhang, J. Williams, A. Bourret, A. Ramamurthy, J. Yuan, R. Guo, M. Matsumoto, A. Vattay, W. Maniara, A. Amaral, M. Dorsch, J. F. Kelleher, III, *J. Med. Chem.* **2009**, *52*, 3954-3968.
- [12] T. Ikeda, H. Ikeda, Y. Takahashi, M. Yamada, K. Mizuno, S. Tero-Kubota, S. Yamauchi, *J. Am. Chem. Soc.* **2008**, *130*, 2466-2472.

## Characterization Data of Products

ShaoZhiHui. 6. fid  
szh-jq-28-3  
1H  
DMSO  
6/ShaoZhiHui

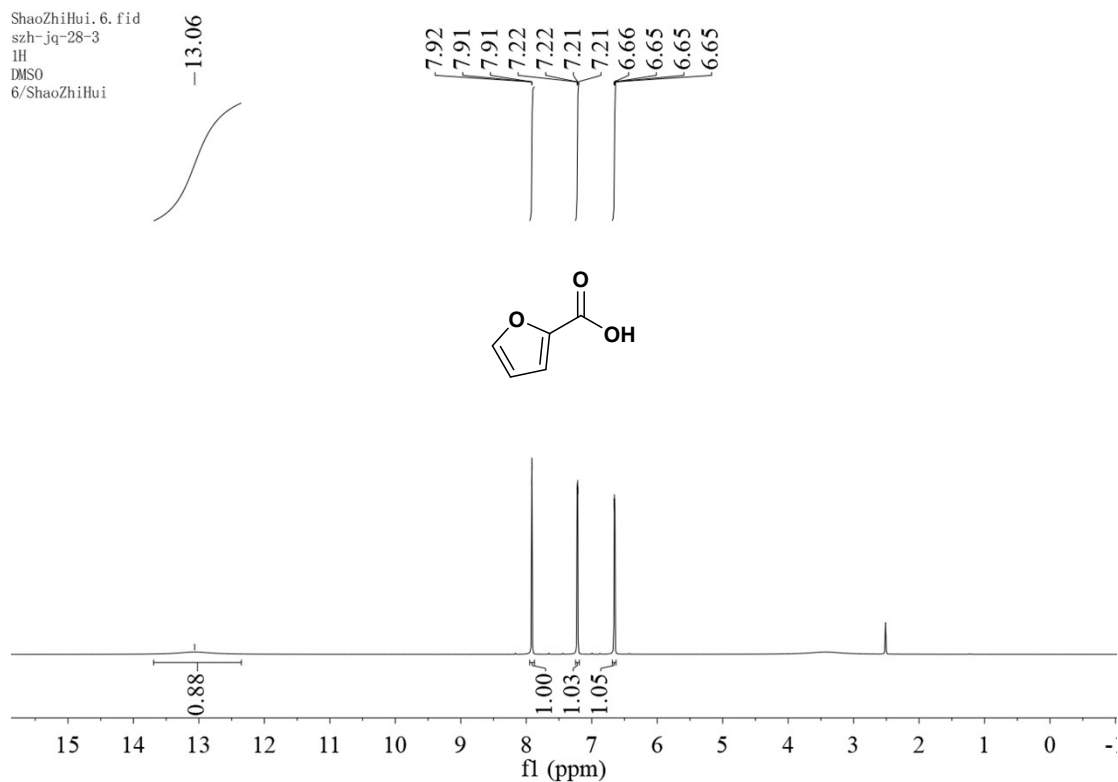

<sup>1</sup>H NMR-spectrum (400 MHz, DMSO-*d*<sub>6</sub>) of **2a**

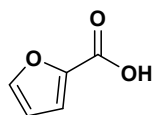

ShaoZhiHui. 11. fid  
szh-jq-28-3  
13C  
DMSO  
11/ShaoZhiHui  
C13CPD DMSO F:\ Administrator 6

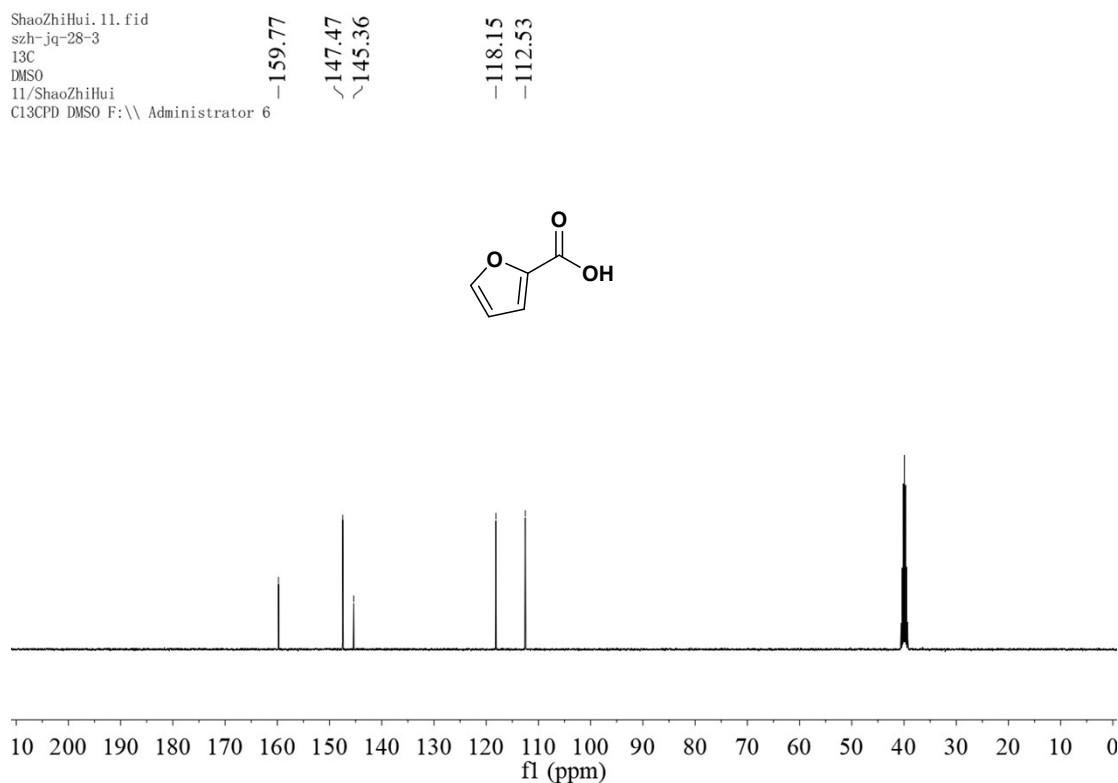

<sup>13</sup>C NMR-spectrum (101 MHz, DMSO-*d*<sub>6</sub>) of **2a**

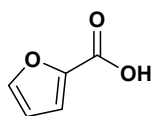

ShaoZhiHui. 8. fid  
szh-jq-28-5  
1H  
DMSO  
8/ShaoZhiHui

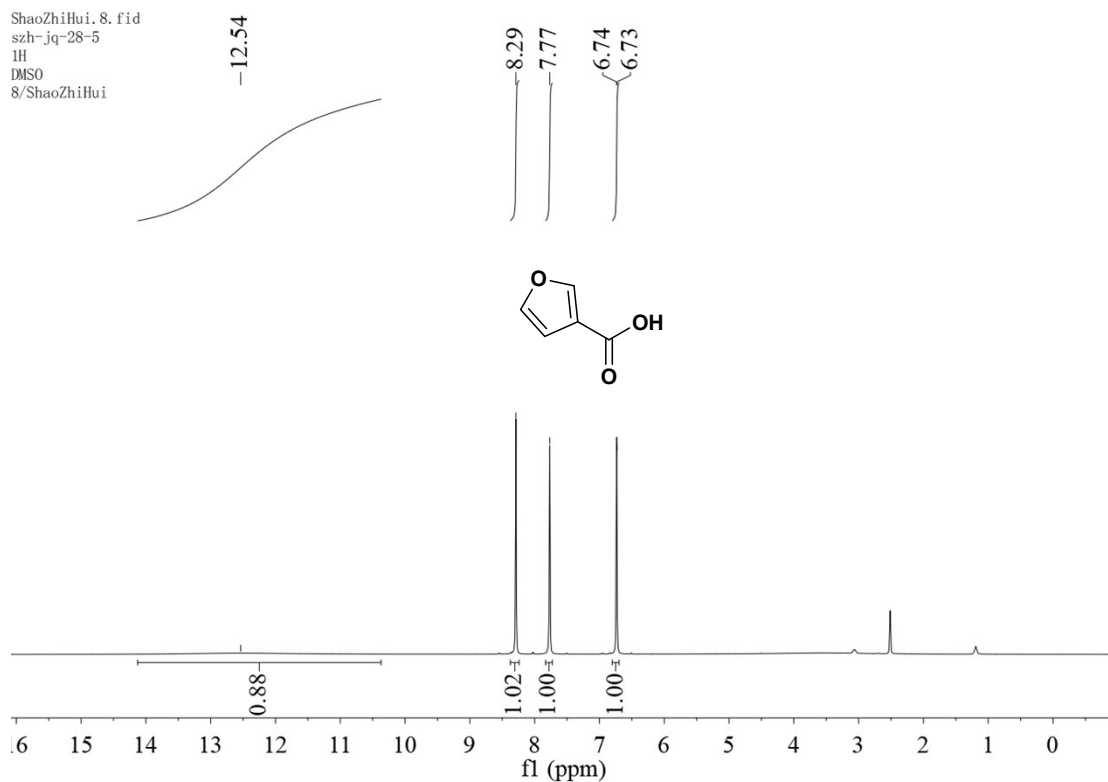

<sup>1</sup>H NMR-spectrum (400 MHz, DMSO-*d*<sub>6</sub>) of **2b**

ShaoZhiHui. 13. fid  
szh-jq-28-5  
13C  
DMSO  
13/ShaoZhiHui  
C13CPD DMSO F:\\ Administrator 8

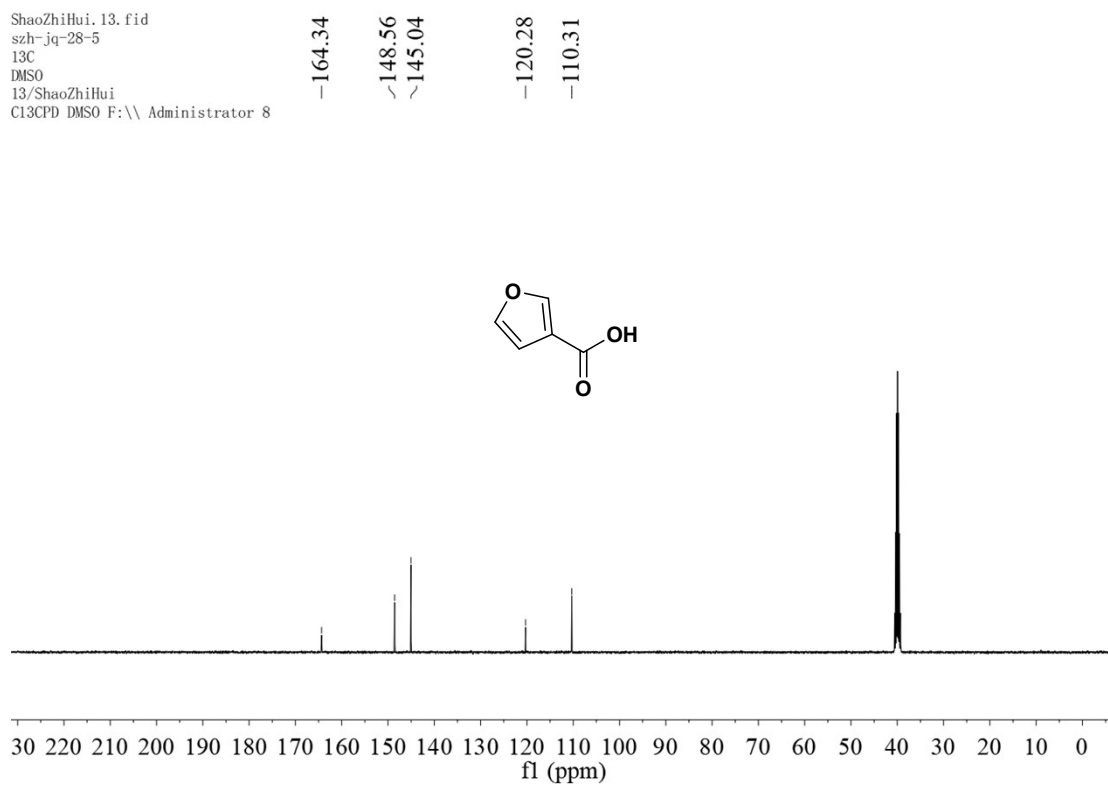

<sup>13</sup>C NMR-spectrum (101 MHz, DMSO-*d*<sub>6</sub>) of **2b**

ShaoZhiHui. 27. fid  
szh-jq-28-9  
1H  
DMSO  
27/ShaoZhiHui  
PROTON DMSO F:\\ Administrator 50

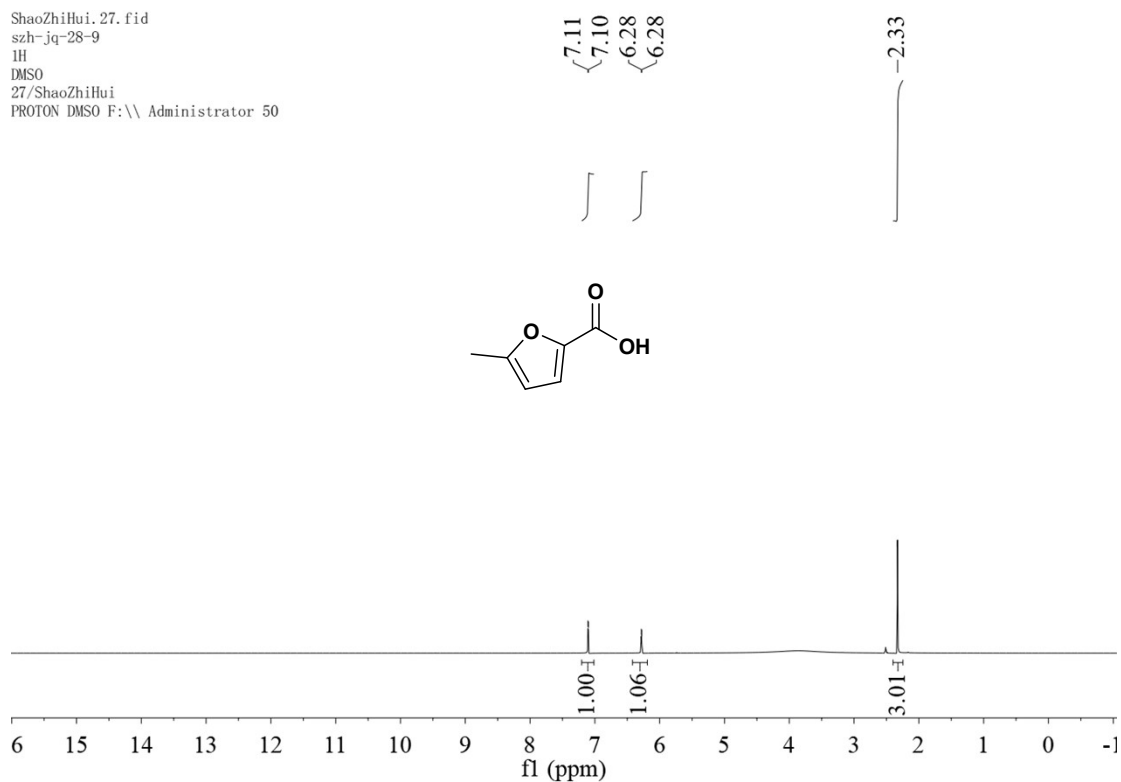

<sup>1</sup>H NMR-spectrum (400 MHz, DMSO-*d*<sub>6</sub>) of 2c

ShaoZhiHui. 33. fid  
szh-jq-28-9  
13C  
DMSO  
33/ShaoZhiHui  
C13CPD DMSO F:\\ Administrator 3

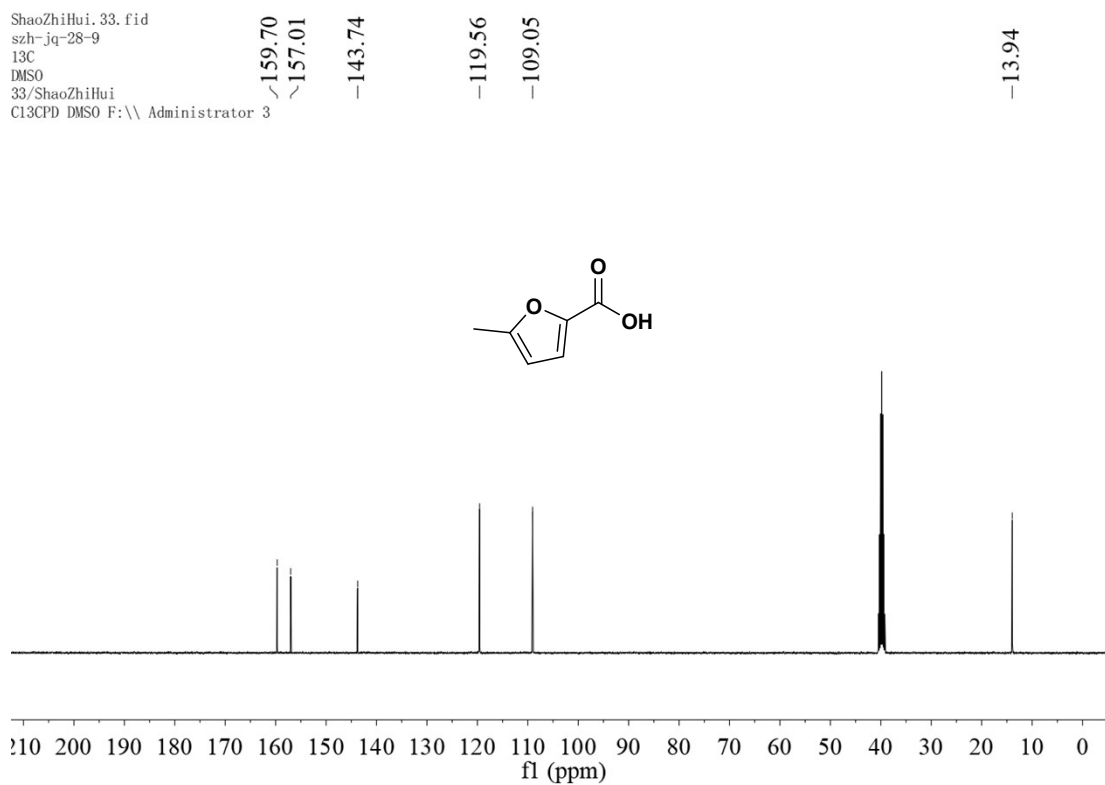

<sup>13</sup>C NMR-spectrum (101 MHz, DMSO-*d*<sub>6</sub>) of 2c

ShaoZhiHui. 26. fid  
szh-jq-28-8  
1H  
DMSO  
26/ShaoZhiHui  
PROTON DMSO F:\\ Administrator 49

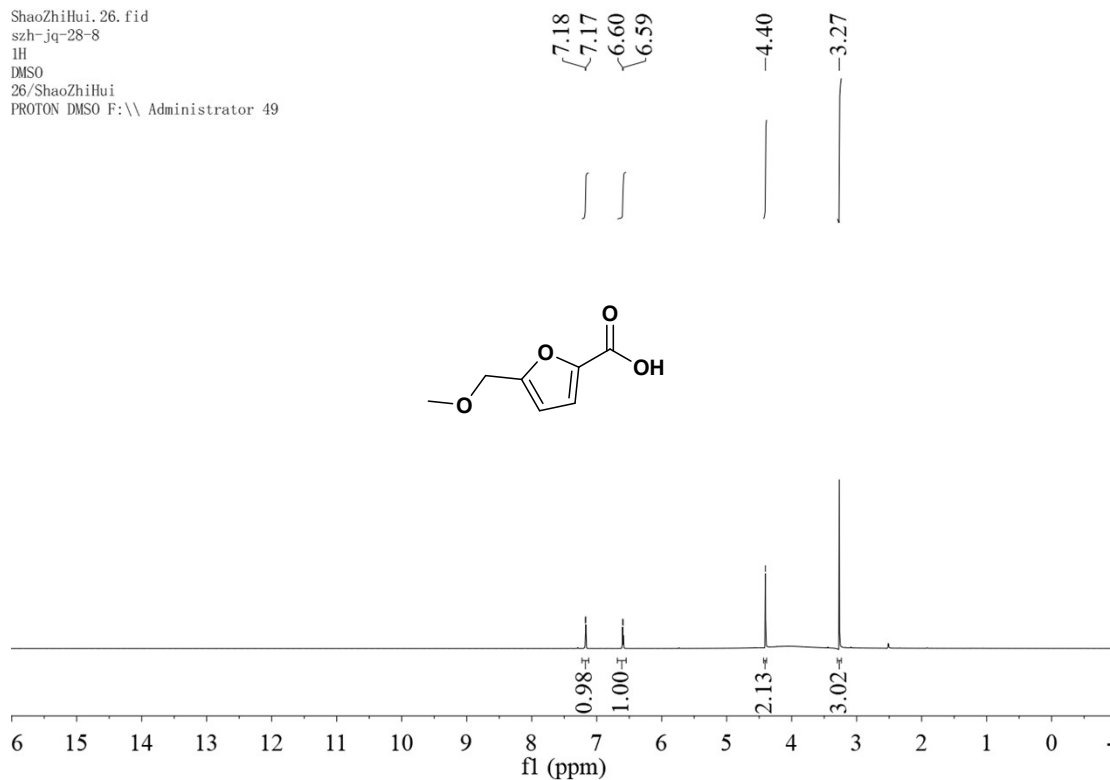

<sup>1</sup>H NMR-spectrum (400 MHz, DMSO-*d*<sub>6</sub>) of **2d**

ShaoZhiHui. 32. fid  
szh-jq-28-8  
13C  
DMSO  
32/ShaoZhiHui  
C13CPD DMSO F:\\ Administrator 2

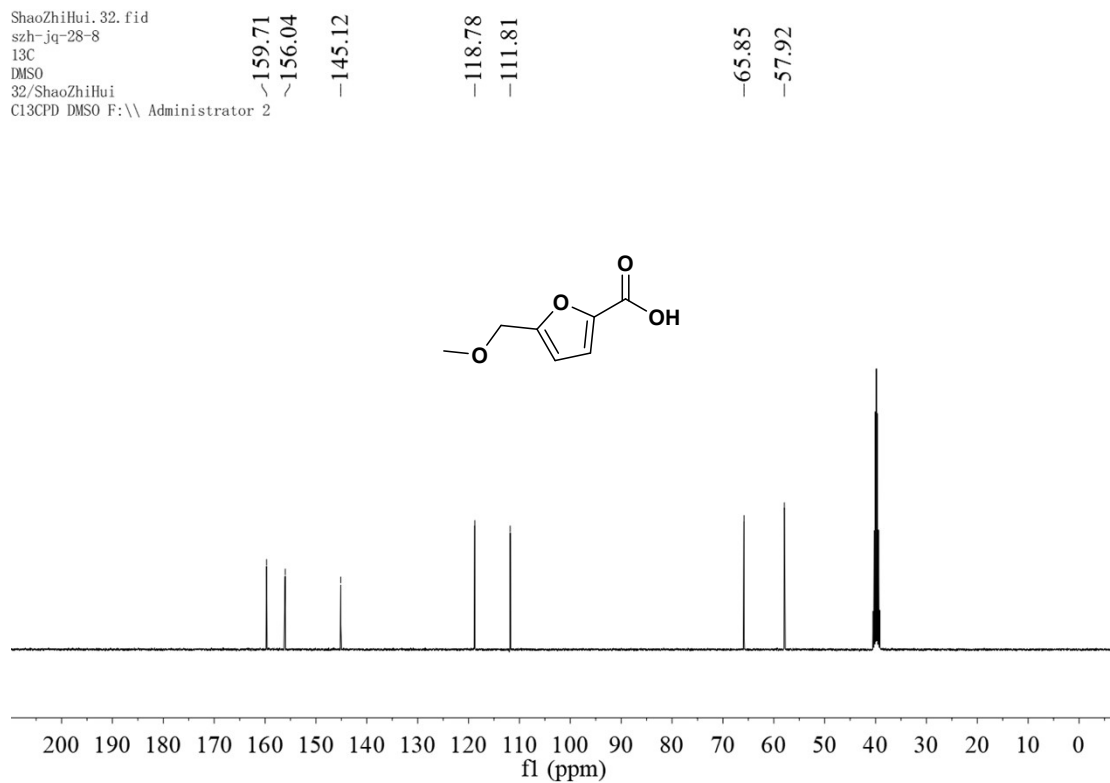

<sup>13</sup>C NMR-spectrum (101 MHz, DMSO-*d*<sub>6</sub>) of **2d**

ShaoZhiHui. 29. fid  
szh-jq-28-11  
1H  
DMSO  
29/ShaoZhiHui  
PROTON DMSO F:\\ Administrator 52

7.29  
7.28  
6.69  
6.68

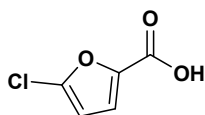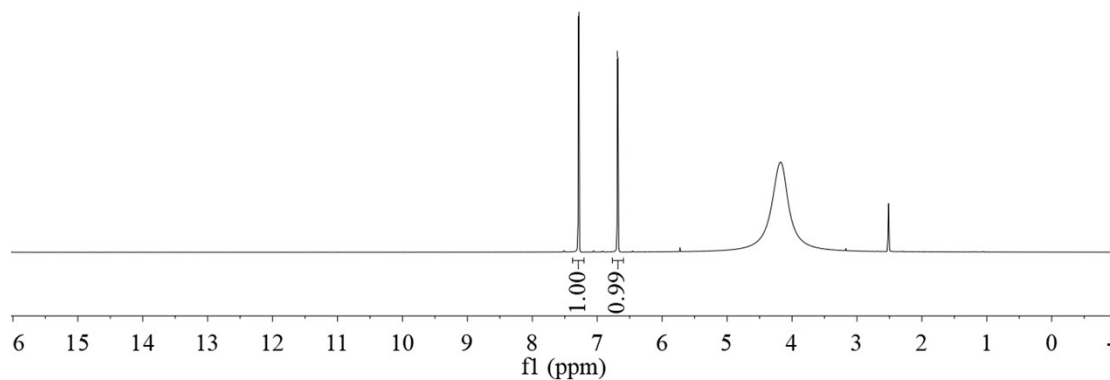

<sup>1</sup>H NMR-spectrum (400 MHz, DMSO-*d*<sub>6</sub>) of **2e**

ShaoZhiHui. 35. fid  
szh-jq-28-11  
13C  
DMSO  
35/ShaoZhiHui  
C13CPD DMSO F:\\ Administrator 5

158.71  
144.97  
139.57  
120.45  
110.04

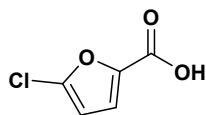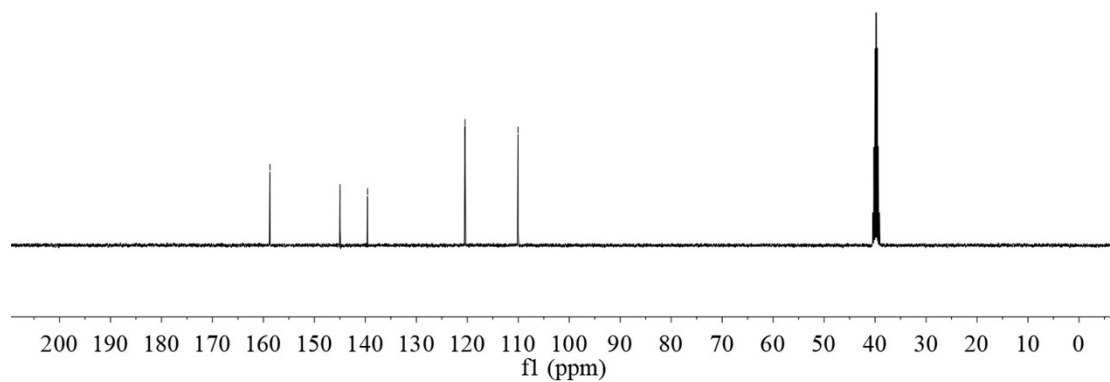

<sup>13</sup>C NMR-spectrum (101 MHz, DMSO-*d*<sub>6</sub>) of **2e**



ShaoZhiHui. 5. fid  
szh-jq-28-2  
1H  
DMSO  
5/ShaoZhiHui

7.26  
7.25  
6.81  
6.80

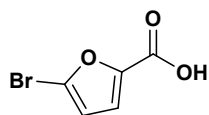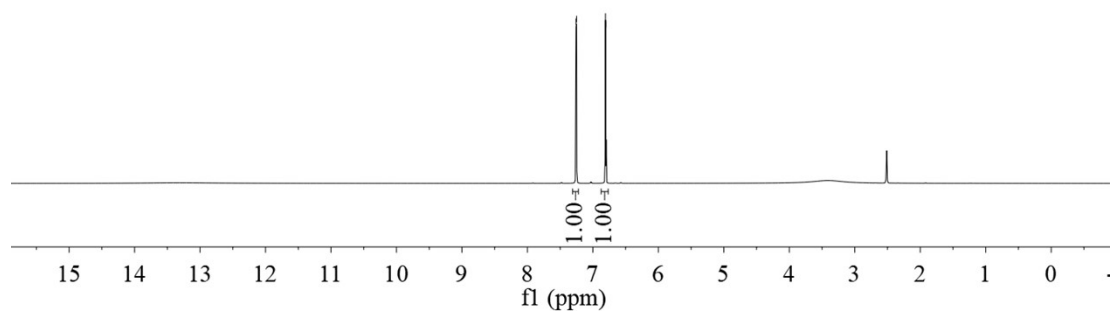

<sup>1</sup>H NMR-spectrum (400 MHz, DMSO-*d*<sub>6</sub>) of **2f**

ShaoZhiHui. 10. fid  
szh-jq-28-2  
13C  
DMSO  
10/ShaoZhiHui  
C13CPD DMSO F:\\ Administrator 5

158.69  
147.25  
127.18  
120.52  
114.82

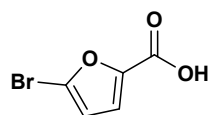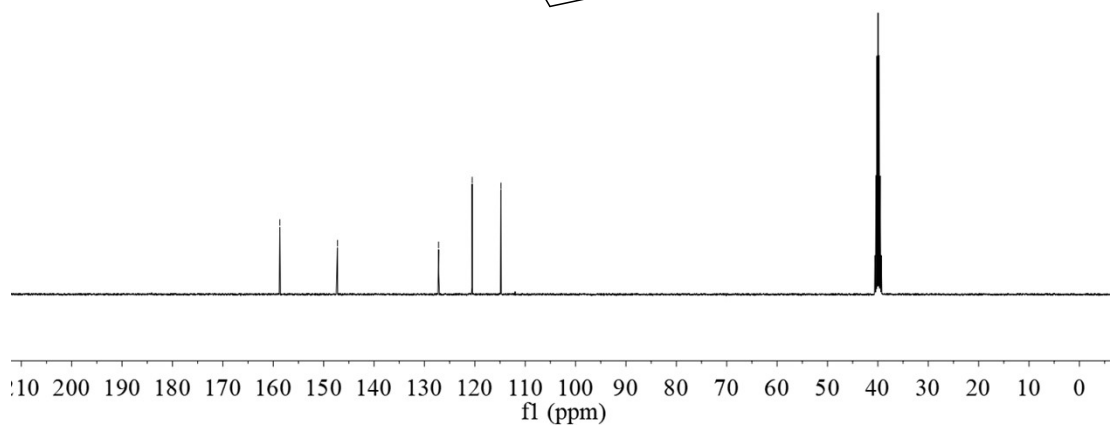

<sup>13</sup>C NMR-spectrum (101 MHz, DMSO-*d*<sub>6</sub>) of **2f**

ShaoZhiHui. 38. fid  
szh-jq-28-12  
1H  
DMSO  
38/ShaoZhiHui  
PROTON DMSO F:\\ Administrator 4

8.37  
6.84

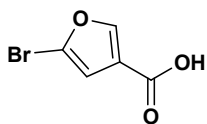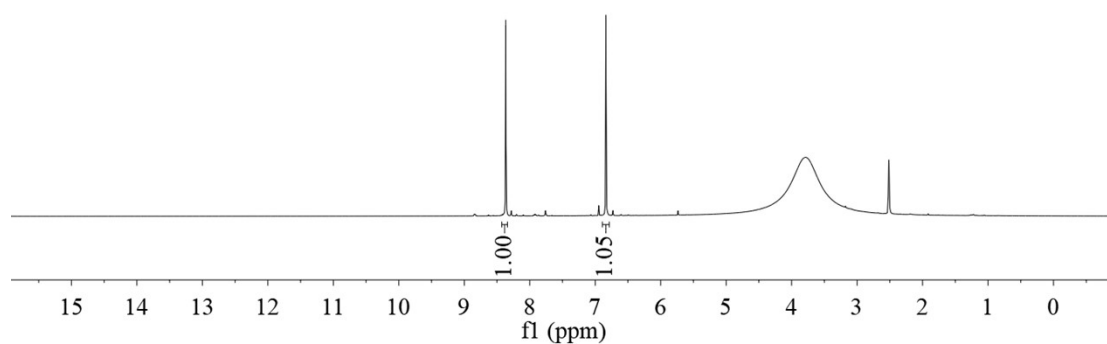

<sup>1</sup>H NMR-spectrum (400 MHz, DMSO-*d*<sub>6</sub>) of **2g**

ShaoZhiHui. 40. fid  
szh-jq-28-12  
13C  
DMSO  
40/ShaoZhiHui  
C13CPD DMSO F:\\ Administrator 4

163.19  
150.37  
123.96  
122.66  
111.93

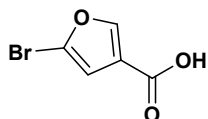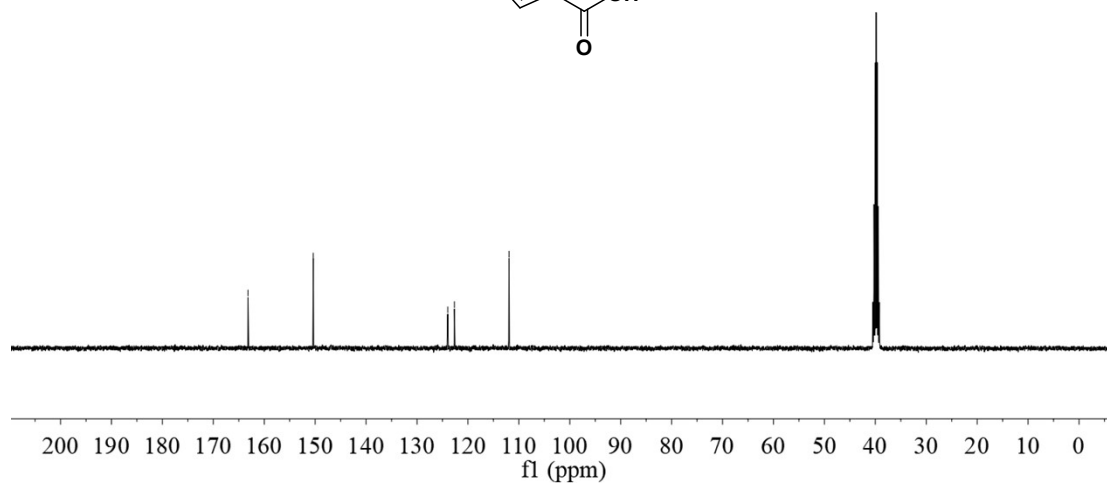

<sup>13</sup>C NMR-spectrum (101 MHz, DMSO-*d*<sub>6</sub>) of **2g**

ShaoZhiHui. 7. fid  
szh-jq-28-4  
1H  
DMSO  
7/ShaoZhiHui

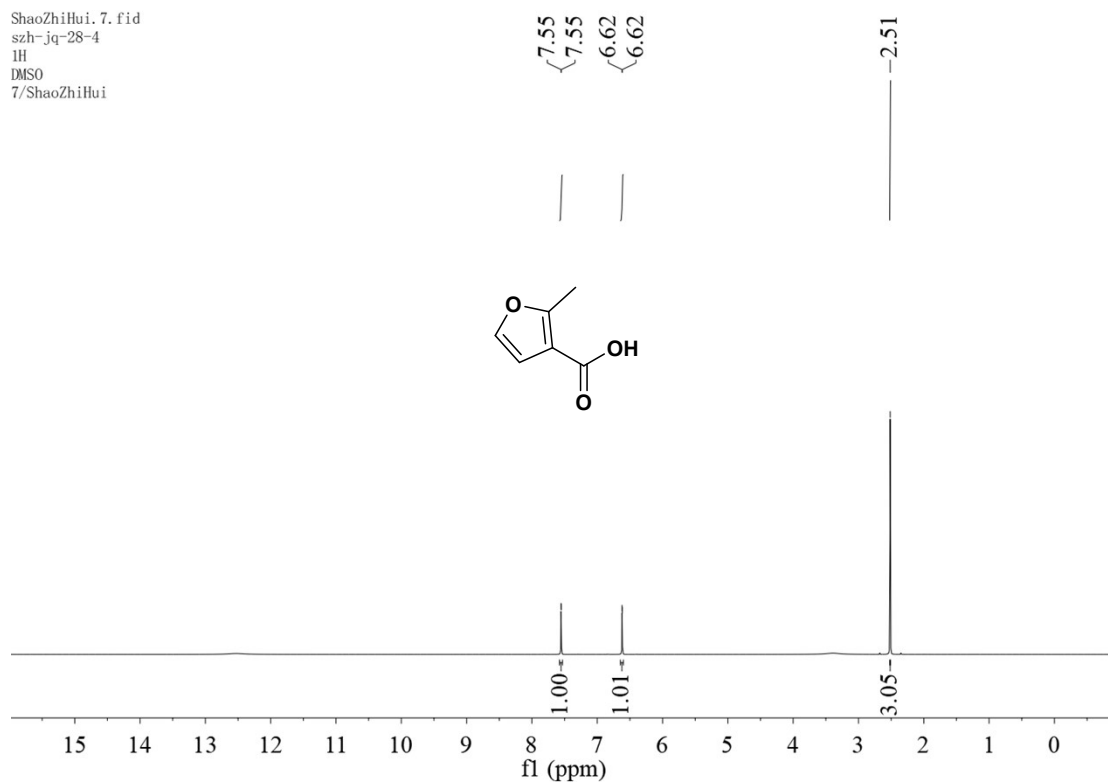

<sup>1</sup>H NMR-spectrum (400 MHz, DMSO-*d*<sub>6</sub>) of **2h**

ShaoZhiHui. 12. fid  
szh-jq-28-4  
13C  
DMSO  
12/ShaoZhiHui  
C13CPD DMSO F:\ Administrator 7

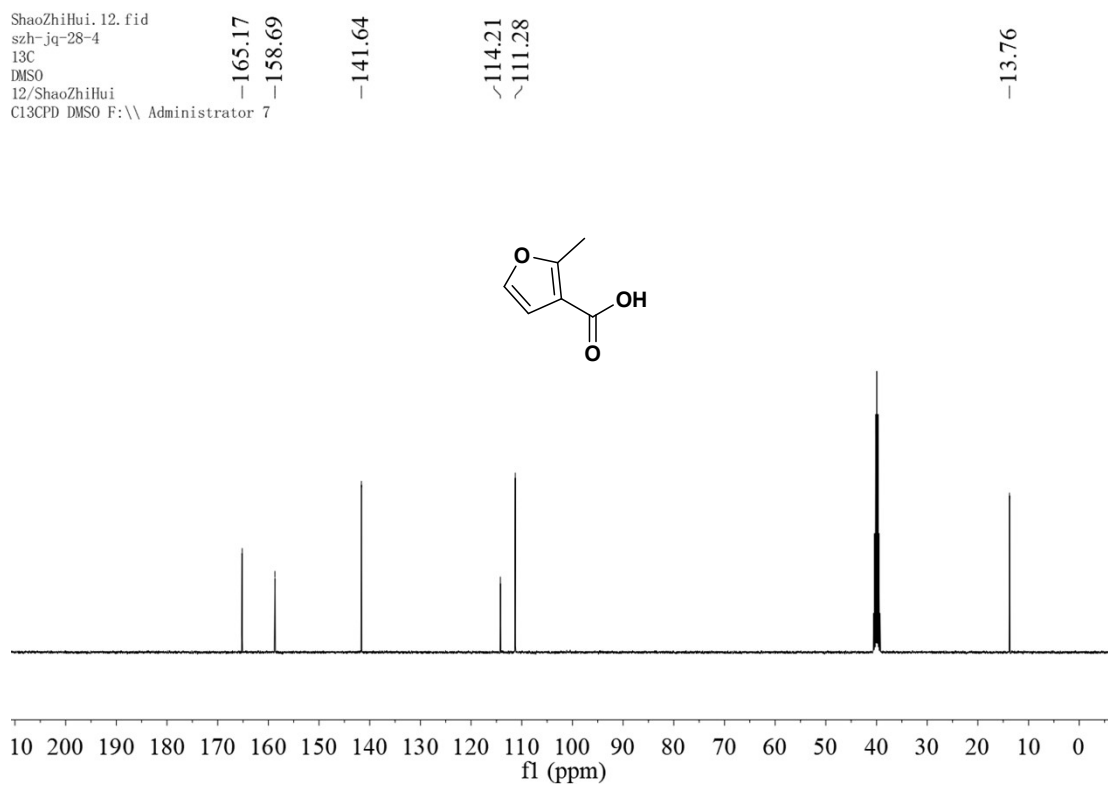

<sup>13</sup>C NMR-spectrum (101 MHz, DMSO-*d*<sub>6</sub>) of **2h**

ShaoZhiHui. 25. fid  
szh-jq-28-7  
1H  
DMSO  
25/ShaoZhiHui  
PROTON DMSO F:\\ Administrator 48

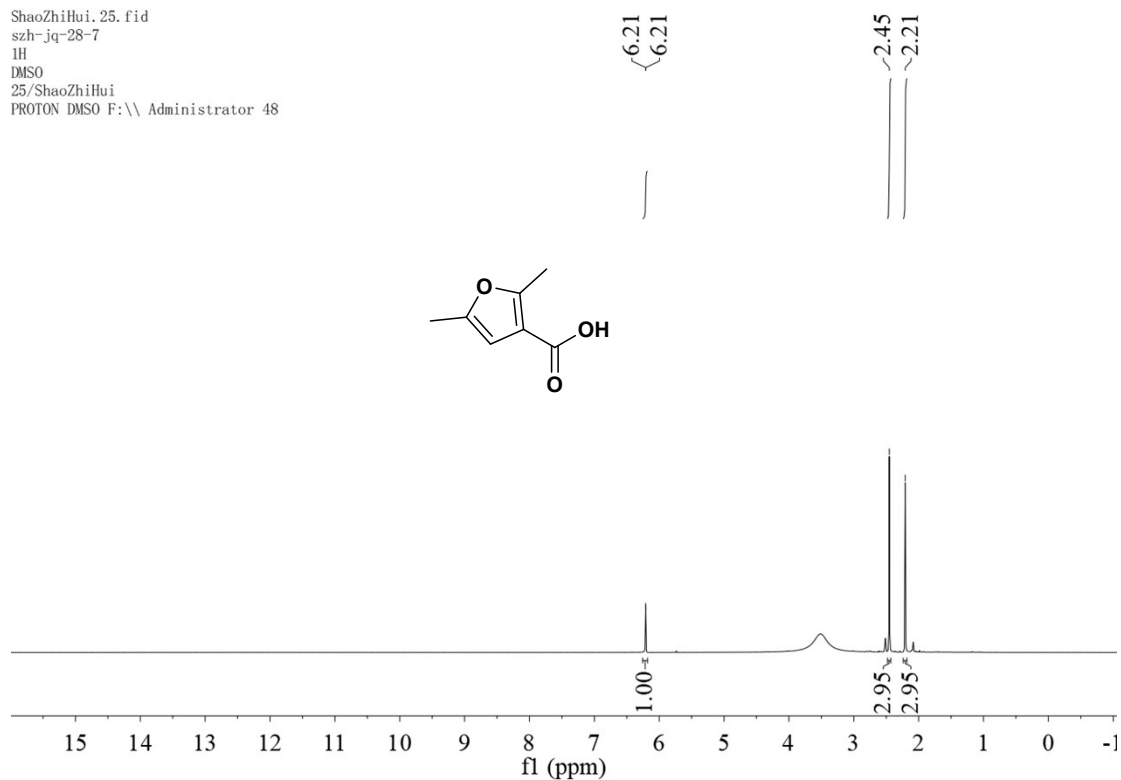

<sup>1</sup>H NMR-spectrum (400 MHz, DMSO-*d*<sub>6</sub>) of **2i**

ShaoZhiHui. 31. fid  
szh-jq-28-7  
13C  
DMSO  
31/ShaoZhiHui

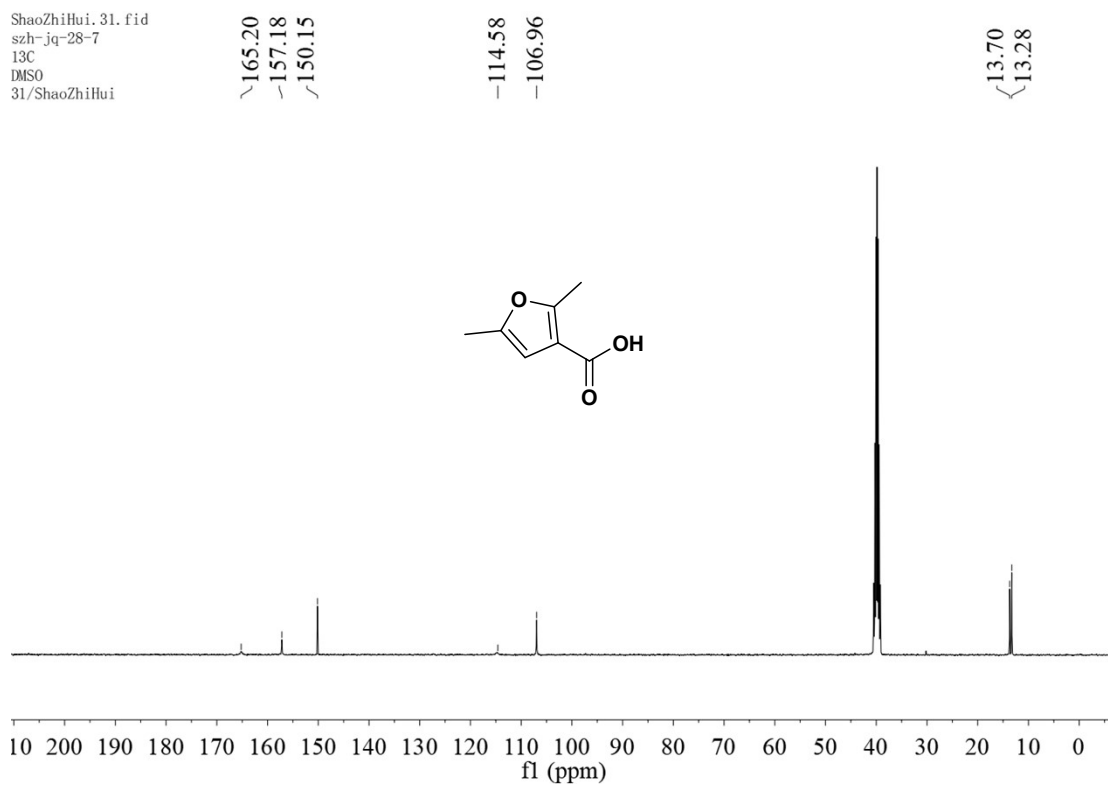

<sup>13</sup>C NMR-spectrum (101 MHz, DMSO-*d*<sub>6</sub>) of **2i**

ShaoZhiHui.4.fid  
szh-jq-28-1  
1H  
DMSO  
4/ShaoZhiHui

-7.29

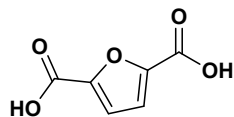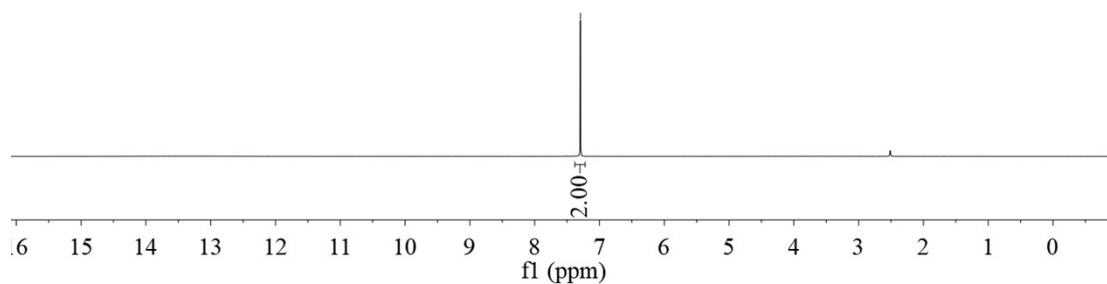

<sup>1</sup>H NMR-spectrum (400 MHz, DMSO-*d*<sub>6</sub>) of **5a**

ShaoZhiHui.9.fid  
szh-jq-28-1  
13C  
DMSO  
9/ShaoZhiHui  
C13CPD DMSO F:\\ Administrator 4

-159.35

-147.47

-118.84

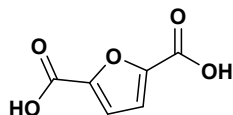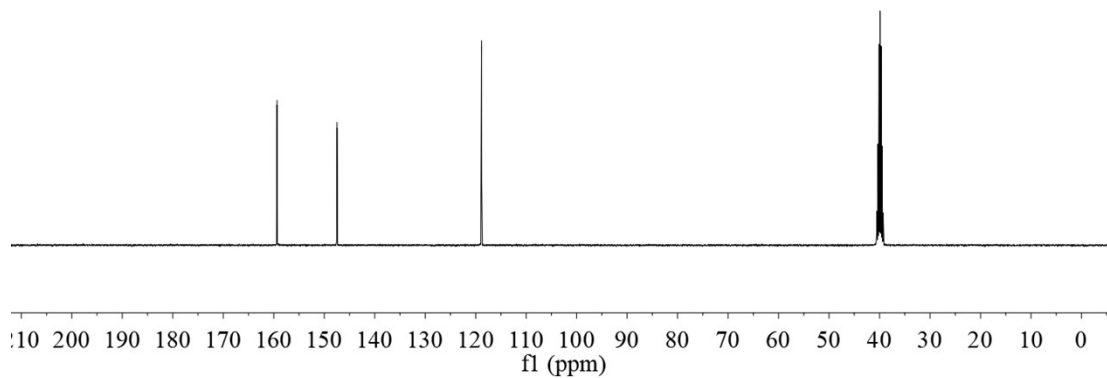

<sup>13</sup>C NMR-spectrum (101 MHz, DMSO-*d*<sub>6</sub>) of **5a**

ShaoZhiHui. 28. fid  
szh-jq-28-10  
1H  
DMSO  
28/ShaoZhiHui  
PROTON DMSO F:\ Administrator 51

7.94  
7.93  
6.90  
6.90

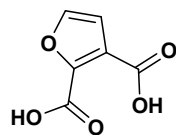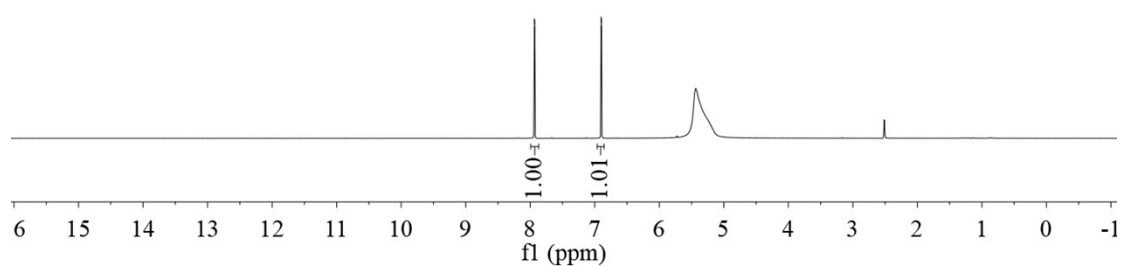

<sup>1</sup>H NMR-spectrum (400 MHz, DMSO-*d*<sub>6</sub>) of **5b**

ShaoZhiHui. 34. fid  
szh-jq-28-10  
13C  
DMSO  
34/ShaoZhiHui  
C13CPD DMSO F:\ Administrator 4

165.09  
159.78  
146.21  
145.54  
124.81  
113.44

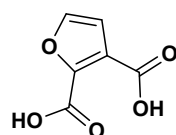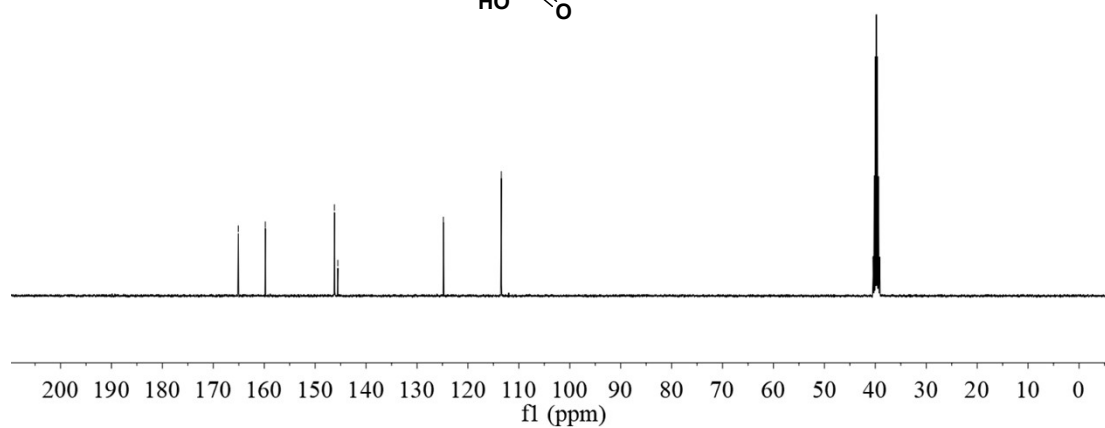

<sup>13</sup>C NMR-spectrum (101 MHz, DMSO-*d*<sub>6</sub>) of **5b**

ShaoZhiHui. 24. fid  
szh-jq-28-6  
1H  
DMSO  
24/ShaoZhiHui  
PROTON DMSO F:\ Administrator 47

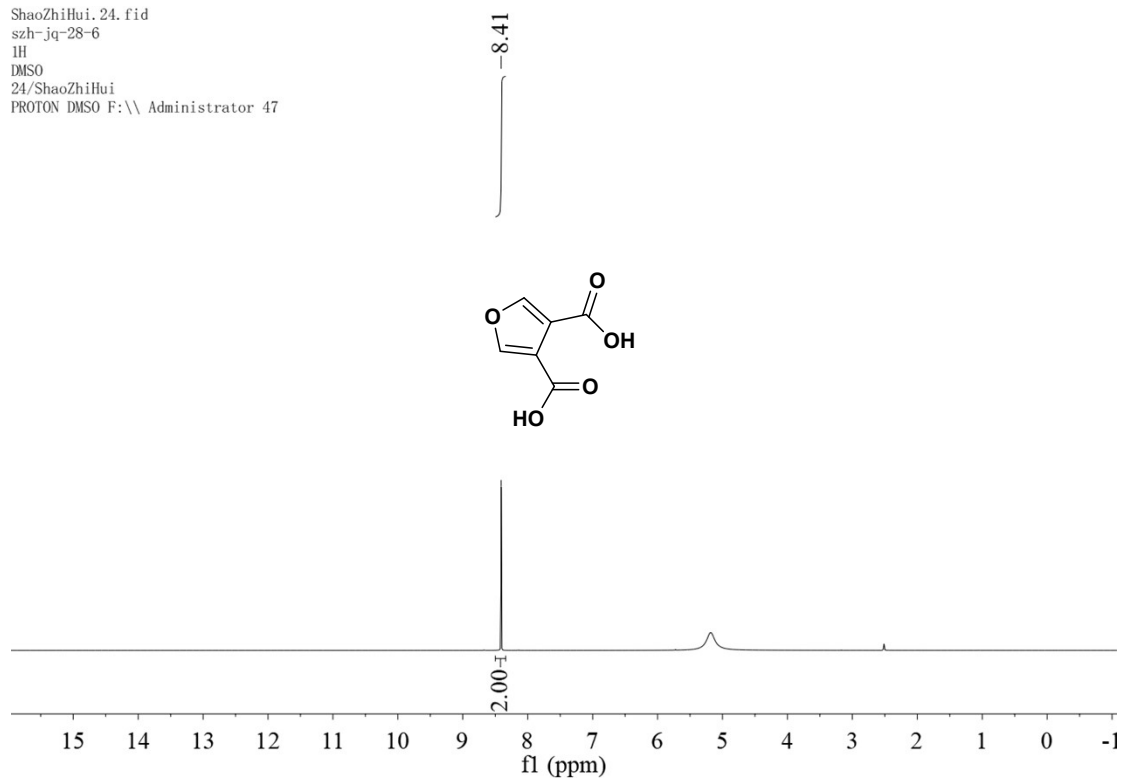

<sup>1</sup>H NMR-spectrum (400 MHz, DMSO-*d*<sub>6</sub>) of **5c**

ShaoZhiHui. 30. fid  
szh-jq-28-6  
13C  
DMSO  
30/ShaoZhiHui  
C13CPD DMSO F:\ Administrator 60

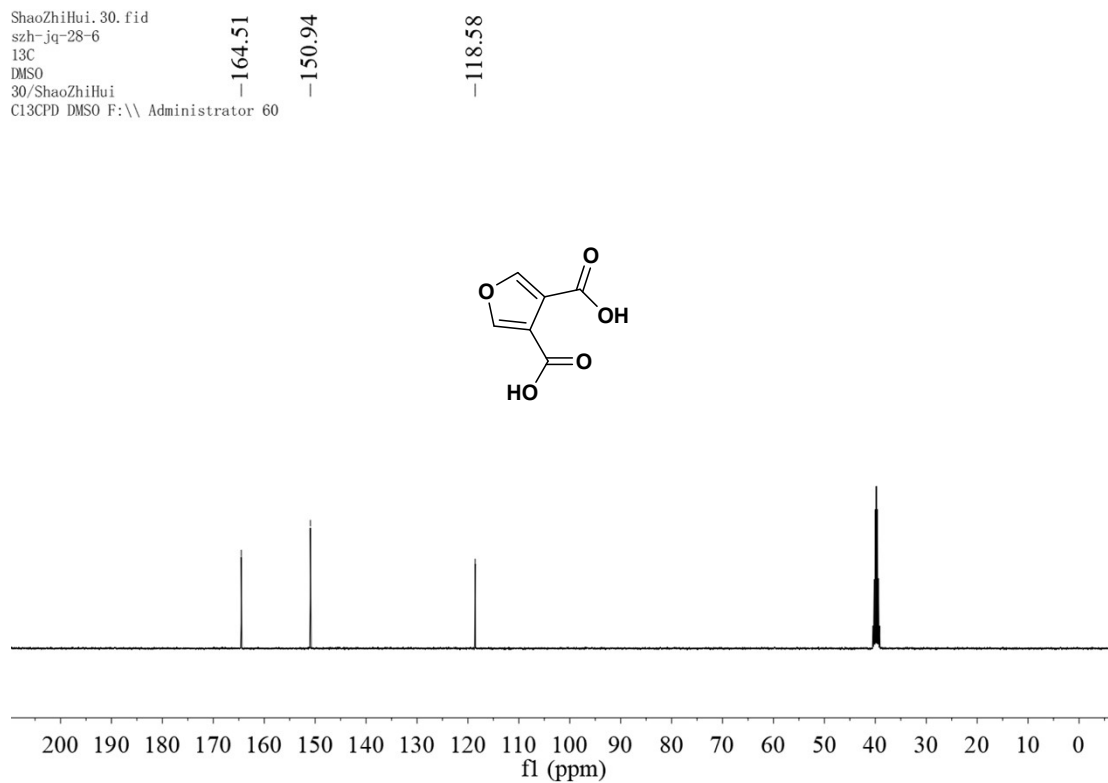

<sup>13</sup>C NMR-spectrum (101 MHz, DMSO-*d*<sub>6</sub>) of **5c**
